# Supplementary material for: Deciphering the genomes of motility-deficient mutants of Vibrio alginolyticus 138-2
Source: PeerJ. 2024 Mar 18;12:e17126. doi: 10.7717/peerj.17126 (PMC10956519; doi:10.7717/peerj.17126)
Supplement: Supplemental Information 6 [file peerj-12-17126-s006.xlsx]

## Sheet: Table S5
Chromosome	position	mutation	annotation	gene	description	138-2	VIO5	KK148	NMB136	NMB155	NMB75	NMB82	NMB88	NMB91	NMB93	NMB95	NMB98	NMB99	NMB102	NMB103	NMB105	NMB106	NMB111	NMB116	YM19	YM4	YM51
I	8575	C→T	S263N (AGT→AAT)	avtA ←	valine‑‑pyruvate transaminase																		1
I	10270	C→T	V467I (GTC→ATC)	malS ←	alpha‑amylase																		1
I	15777	C→T	L137F (CTT→TTT)	Vag1382_00120 →	UPF0016 family membrane protein														1
I	33251	C→T	P183L (CCA→CTA)	ilvC →	ketol‑acid reductoisomerase (NADP(+))																1
I	33713	C→T	T337I (ACT→ATT)	ilvC →	ketol‑acid reductoisomerase (NADP(+))					1
I	38428	C→T	D183N (GAT→AAT)	Vag1382_00270 ←	MexH family multidrug efflux RND transporter periplasmic adaptor subunit																	1
I	45213	C→T	Q111* (CAG→TAG)	Vag1382_00320 →	peptide ABC transporter ATP‑binding protein				1
I	46524	C→T	H548Y (CAC→TAC)	Vag1382_00320 →	peptide ABC transporter ATP‑binding protein				1
I	135143	C→T	D100N (GAT→AAT)	hslO ←	33 kDa chaperonin		1	1	1	1
I	158718	C→T	intergenic (+52/‑51)	ompR → / → envZ	DNA‑binding response regulator/two‑component sensor histidine kinase																	1
I	160398	C→T	G376S (GGT→AGT)	Vag1382_01350 ←	xanthine permease														1
I	165966	T→A	D328V (GAT→GTT)	Vag1382_01380 ←	bifunctional GTP diphosphokinase/guanosine‑3',5'‑bis(diphosphate) 3'‑diphosphatase						1	1	1	1	1	1	1	1	1	1	1	1	1	1	1	1	1
I	181016	C→T	A89V (GCC→GTC)	Vag1382_01510 →	peptide ABC transporter ATP‑binding protein																	1
I	213963	G→C	Q180E (CAA→GAA)	Vag1382_01870 ←	3‑deoxy‑D‑manno‑octulosonic acid transferase																					1
I	303527	G→A	S216S (AGC→AGT)	Vag1382_02830 ←	peptide ABC transporter permease													1
I	321852	G→A	V172I (GTA→ATA)	thiQ →	thiamine import ATP‑binding protein ThiQ													1
I	340193	G→A	I243I (ATC→ATT)	surA ←	chaperone SurA													1
I	367091	G→A	E529K (GAA→AAA)	glmS →	glutamine‑‑fructose‑6‑phosphate aminotransferase [isomerizing]													1
I	367198	C→T	I564I (ATC→ATT)	glmS →	glutamine‑‑fructose‑6‑phosphate aminotransferase [isomerizing]																	1
I	377059	G→A	R213R (CGC→CGT)	Vag1382_03470 ←	sigma‑54‑dependent Fis family transcriptional regulator													1
I	379676	G→A	intergenic (‑94/+19)	mtlD ← / ← Vag1382_03500	mannitol‑1‑phosphate 5‑dehydrogenase/PTS mannitol transporter subunit IICBA													1
I	391570	C→T	L155L (CTG→CTA)	dnaG ←	DNA primase			1
I	405692	T→C	D2G (GAT→GGT)	Vag1382_03720 ←	phosphate transporter														1
I	415183	Δ11 bp	coding (1193‑1203/1323 nt)	tolC ←	outer membrane channel protein						1	1	1	1	1	1	1	1	1	1	1	1	1	1	1	1	1
I	438843	G→T	intergenic (+630/‑195)	rsmI → / → rsmH	ribosomal RNA small subunit methyltransferase I/ribosomal RNA small subunit methyltransferase H						1	1	1	1	1	1	1	1	1	1	1	1	1	1
I	472806	C→T	E64K (GAA→AAA)	Vag1382_04310 ←	hypothetical protein					1
I	482369	A→G	V1052A (GTA→GCA)	Vag1382_04350 ←	glutamate synthase																1
I	485114	A→C	I137S (ATC→AGC)	Vag1382_04350 ←	glutamate synthase		1	1	1	1
I	505370	G→A	G127S (GGT→AGT)	Vag1382_04530 →	sodium:alanine symporter								1
I	517755	C→T	T341T (ACC→ACT)	lysS →	lysine‑‑tRNA ligase											1
I	557240	C→T	R168H (CGC→CAC)	Vag1382_05010 ←	energy‑dependent translational throttle protein EttA																	1
I	561219	C→T	R335H (CGT→CAT)	Vag1382_05050 ←	bifunctional chorismate mutase/prephenate dehydratase																			1
I	582644	A→C	M256L (ATG→CTG)	phoR →	PAS domain‑containing sensor histidine kinase						1	1	1	1	1	1	1	1	1	1	1	1	1	1	1	1	1
I	589859	C→T	V634V (GTC→GTT)	Vag1382_05230 →	phosphate ABC transporter permease						1	1	1	1	1	1	1	1	1	1	1	1	1	1
I	592588	(TCAT)2→1	coding (720‑723/819 nt)	pstB1 →	phosphate import ATP‑binding protein PstB 1						1	1	1	1	1	1	1	1	1	1	1	1	1	1	1	1	1
I	593503	C→T	Q251Q (CAG→CAA)	Vag1382_05270 ←	polyphosphate kinase 2					1
I	684939	C→T	H50H (CAC→CAT)	Vag1382_06090 →	hypothetical protein																	1
I	706577	C→T	H234H (CAC→CAT)	Vag1382_06230 →	UPF0255 protein																1
I	720807	C→T	P16S (CCG→TCG)	pomB →	flagellar motor protein PomB					1
I	786121	C→A	noncoding (26/77 nt)	Vag1382_t00270 →	tRNA‑Pro														1
I	793976	G→A	S446F (TCC→TTC)	Vag1382_07050 ←	copper‑translocating P‑type ATPase			1
I	807375	Δ1 bp	F81-FS(89 aa)	cheR →	chemotaxis protein methyltransferase CheR						1
I	810839	C→T	S333S (AGC→AGT)	Vag1382_07220 →	flagellar hook protein FlgE																			1
I	818185	C→T	Q62* (CAA→TAA)	flgL →	flagellar hook‑associated protein FlgL															1
I	818587	C→T	Q196* (CAG→TAG)	flgL →	flagellar hook‑associated protein FlgL																			1
I	829660	G→A	E194K (GAG→AAG)	zipA →	cell division protein ZipA											1
I	861245	C→T	N247N (AAC→AAT)	glnS →	glutamine‑‑tRNA ligase																			1
I	903010	G→A	D372N (GAC→AAC)	Vag1382_08080 →	long‑chain‑fatty‑acid‑‑CoA ligase																1
I	911564	G→A	intergenic (‑20/‑184)	folD ← / → Vag1382_t00290	bifunctional protein FolD/tRNA‑Arg																1
I	941516	C→T	S94L (TCG→TTG)	Vag1382_08450 →	sugar transporter									1
I	949576	G→A	T298I (ACT→ATT)	Vag1382_08510 ←	ATPase																1
I	969329	G→A	intergenic (+13/‑114)	menB → / → menC	1,4‑dihydroxy‑2‑naphthoyl‑CoA synthase/o‑succinylbenzoate synthase																1
I	987346	G→A	E361K (GAA→AAA)	Vag1382_08820 →	hypothetical protein																1
I	1017434	G→A	V222V (GTG→GTA)	Vag1382_09110 →	thiamine kinase																1
I	1084435	C→T	intergenic (‑220/+272)	Vag1382_09660 ← / ← purR	DNA transformation protein/HTH‑type transcriptional repressor PurR																	1
I	1086232	C→T	A198A (GCG→GCA)	torD ←	chaperone protein TorD																	1
I	1100955	G→A	R41R (CGC→CGT)	cmoB ←	tRNA U34 carboxymethyltransferase																1
I	1119267	G→A	W107* (TGG→TGA)	Vag1382_09990 →	potassium channel protein																1
I	1124578	G→A	V561M (GTG→ATG)	Vag1382_10040 →	sensor histidine kinase																	1
I	1142272	(T)5→4	coding (754/765 nt)	Vag1382_10170 ←	hypothetical protein zomB									1
I	1142485	G→A	R181* (CGA→TGA)	Vag1382_10170 ←	hypothetical protein zomB												1
I	1146701	G→A	I27I (ATC→ATT)	Vag1382_10200 ←	alanine dehydrogenase												1
I	1150069	C→T	L829L (CTA→TTA)	ftsK →	DNA translocase FtsK																		1
I	1164836	T→A	L196* (TTA→TAA)	Vag1382_10380 →	amine oxidase																	1
I	1171900	G→A	H241H (CAC→CAT)	mnmA ←	tRNA‑specific 2‑thiouridylase MnmA												1
I	1172844	G→A	E12K (GAG→AAG)	Vag1382_10470 →	hypothetical protein																	1
I	1174956	G→T	A16E (GCA→GAA)	Vag1382_10490 ←	DNA‑binding protein						1	1	1	1	1	1	1	1	1	1	1	1	1	1	1	1	1
I	1203307	G→A	I145I (ATC→ATT)	Vag1382_10710 ←	hypothetical protein																	1
I	1209379	G→A	Q33Q (CAG→CAA)	Vag1382_10740 →	hypothetical protein																	1
I	1214796	G→A	A119V (GCC→GTC)	Vag1382_10800 ←	acyl‑CoA thioesterase																	1
I	1228869	G→A	N133N (AAC→AAT)	trpD ←	anthranilate phosphoribosyltransferase																		1
I	1239324	G→A	D312D (GAC→GAT)	Vag1382_11030 ←	DNA polymerase																	1
I	1297441	G→A	intergenic (‑181/+65)	Vag1382_11510 ← / ← Vag1382_11520	hypothetical protein/hypothetical protein				1
I	1339272	G→A	R114R (AGG→AGA)	Vag1382_11910 →	hypothetical protein																1
I	1433758	G→A	A266T (GCG→ACG)	Vag1382_12930 →	hypothetical protein																1
I	1435322	G→A	P247S (CCA→TCA)	Vag1382_12950 ←	3‑oxoacyl‑ACP reductase																1
I	1463855	G→A	D139D (GAC→GAT)	Vag1382_13260 ←	bordetella uptake gene family protein											1
I	1514096	C→A	A255S (GCG→TCG)	Vag1382_13550 ←	amino acid ABC transporter permease			1
I	1610286	G→A	R346C (CGC→TGC)	Vag1382_14490 ←	ABC‑F family ATPase																	1
I	1616497	Δ13 bp	coding (320‑332/699 nt)	Vag1382_14530 →	ABC transporter permease											1
I	1617062	C→T	L46L (CTA→TTA)	Vag1382_14540 →	ABC transporter ATP‑binding protein			1
I	1686319	T→G	E137D (GAA→GAC)	Vag1382_15140 ←	hypothetical protein			1
I	1697747	G→A	T175I (ACC→ATC)	Vag1382_15240 ←	SM‑20			1
I	1735041	(T)5→4	intergenic (‑142/‑297)	Vag1382_15550 ← / → Vag1382_15560	cyclic nucleotide‑binding protein/glycine betaine/L‑proline ABC transporter ATP‑binding protein				1
I	1737665	G→A	A18T (GCA→ACA)	proX →	glycine betaine ABC transporter substrate‑binding protein					1
I	1773590	G→A	T149I (ACT→ATT)	Vag1382_15910 ←	hypothetical protein				1
I	1787856	(ACCAA)5→6	coding (1355/1830 nt)	Vag1382_16050 →	hypothetical protein						1	1	1	1	1	1	1	1	1	1	1	1	1	1	1	1	1
I	1858430	(A)6→5	coding (609/675 nt)	Vag1382_16650 →	transcription regulator									1	1		1	1	1	1	1	1	1	1
I	1885712	(TGTTTT)2→1	intergenic (‑206/‑323)	ihfA ← / → Vag1382_16940	integration host factor subunit alpha/membrane protein						1	1	1	1	1	1	1	1	1	1	1	1	1	1	1	1	1
I	1969947	G→A	Y658Y (TAC→TAT)	Vag1382_17620 ←	acyl‑CoA dehydrogenase																		1
I	1998444	C→T	intergenic (‑534/‑216)	Vag1382_17830 ← / → ushA	GNAT family N‑acetyltransferase/bifunctional metallophosphatase/5'‑nucleotidase														1
I	2008373	C→T	R336* (CGA→TGA)	Vag1382_17920 →	anaerobic nitric oxide reductase transcription regulator			1
I	2044442	C→T	T245I (ACA→ATA)	Vag1382_18230 →	ABC transporter permease							1
I	2065000	Δ57 bp	coding (668‑724/1272 nt)	Vag1382_18450 ←	membrane protein						1	1	1	1	1	1	1	1	1	1	1	1	1	1	1	1	1
I	2072073	G→A	A204V (GCG→GTG)	Vag1382_18520 ←	suppressor for copper‑sensitivity B				1
I	2104093	G→A	P352S (CCT→TCT)	Vag1382_18780 ←	transcriptional regulator			1
I	2112125	G→A	N412N (AAC→AAT)	Vag1382_18860 ←	PTS glucose transporter subunit IIBC																		1
I	2123609	G→A	P44L (CCA→CTA)	plsX ←	phosphate acyltransferase																	1
I	2126431	Δ7 bp	intergenic (‑228/‑406)	rluC ← / → rne	ribosomal large subunit pseudouridine synthase C/ribonuclease E						1	1	1	1	1	1	1	1	1	1	1	1	1	1
I	2146151	G→A	R311H (CGT→CAT)	dusC →	tRNA‑dihydrouridine(16) synthase																		1
I	2202612	T→G	S5A (TCT→GCT)	Vag1382_19680 →	UPF0352 protein			1
I	2218825	A→G	intergenic (‑142/‑196)	msrB ← / → Vag1382_19820	peptide methionine sulfoxide reductase MsrB/glyceraldehyde‑3‑phosphate dehydrogenase															1
I	2231706	G→A	G2S (GGT→AGT)	Vag1382_19940 →	membrane protein																	1
I	2249849	G→A	S103L (TCA→TTA)	truA ←	tRNA pseudouridine synthase A																	1
I	2289413	(GCTCTG)9→10	coding (131/1053 nt)	Vag1382_20480 ←	chemotaxis protein CheW					1	1	1	1	1	1	1	1	1	1	1	1	1	1	1	1	1	1
I	2291638	C→T	G687D (GGT→GAT)	cheA ←	chemotaxis protein CheA							1
I	2292164	C→T	G512R (GGA→AGA)	cheA ←	chemotaxis protein CheA																1
I	2294759	C→A	G64C (GGC→TGC)	Vag1382_20530 ←	response regulator CheY										1
I	2294778	C→T	W57* (TGG→TGA)	Vag1382_20530 ←	response regulator CheY				1
I	2296086	C→T	D171N (GAT→AAT)	flhG ←	site‑determining protein FlhG																		1
I	2296272	G→A	Q109* (CAG→TAG)	flhG ←	site‑determining protein FlhG			1
I	2299407	G→A	Q295* (CAG→TAG)	flhA ←	flagellar biosynthesis protein FlhA																				1
I	2305066	G→A	F136F (TTC→TTT)	Vag1382_20640 ←	flagellar motor switch protein FliM																	1
I	2305122	C→T	E118K (GAG→AAG)	Vag1382_20640 ←	flagellar motor switch protein FliM								1
I	2305182	G→A	P98S (CCA→TCA)	Vag1382_20640 ←	flagellar motor switch protein FliM																	1
I	2305245	C→T	E77K (GAA→AAA)	Vag1382_20640 ←	flagellar motor switch protein FliM											1
I	2305323	G→A	P51S (CCG→TCG)	Vag1382_20640 ←	flagellar motor switch protein FliM														1
I	2305328	C→G	R49P (CGA→CCA)	Vag1382_20640 ←	flagellar motor switch protein FliM														1
I	2305331	C→T	G48D (GGT→GAT)	Vag1382_20640 ←	flagellar motor switch protein FliM													1
I	2305449	C→T	E9K (GAA→AAA)	Vag1382_20640 ←	flagellar motor switch protein FliM					1
I	2310588	C→T	A41A (GCG→GCA)	fliH ←	flagellar assembly protein FliH				1
I	2321413	C→T	R73H (CGT→CAT)	flaG ←	protein FlaG				1
I	2324038	C→T	G80S (GGT→AGT)	flaB ←	flagellin B				1
I	2351223	G→A	A468T (GCA→ACA)	Vag1382_21100 →	sulfate permease																	1
I	2367339	C→T	S136N (AGC→AAC)	Vag1382_21260 ←	DNA‑directed DNA polymerase				1
I	2386314	C→T	H720H (CAC→CAT)	glnD →	bifunctional uridylyltransferase/uridylyl‑removing enzyme														1
I	2405425	C→T	V273V (GTG→GTA)	Vag1382_21650 ←	sodium‑dependent transporter							1
I	2429053	G→A	D149D (GAC→GAT)	Vag1382_21880 ←	ATP‑dependent protease																	1
I	2462533	C→T	intergenic (+78/‑82)	glpK → / → Vag1382_22150	glycerol kinase/DeoR/GlpR family transcriptional regulator				1
I	2477811	C→T	D192N (GAC→AAC)	Vag1382_22280 ←	UDP‑glucose 4‑epimerase				1
I	2490331	G→A	F126F (TTC→TTT)	Vag1382_22370 ←	pilus assembly protein TadC																			1
I	2491676	C→T	D2N (GAT→AAT)	Vag1382_22380 ←	pilus assembly protein TadB											1
I	2501870	C→T	Q125* (CAA→TAA)	Vag1382_22500 →	AraC family transcriptional regulator											1
I	2569200	G→A	E85E (GAG→GAA)	Vag1382_23200 →	hypothetical protein																1
I	2585439	T→G	Q73H (CAA→CAC)	Vag1382_23340 ←	hypothetical protein						1	1	1	1	1	1	1	1	1	1	1	1	1	1	1	1	1
I	2599883	G→A	P40S (CCT→TCT)	Vag1382_23520 ←	hypothetical protein											1
I	2603925	A→T	A35A (GCT→GCA)	Vag1382_23540 ←	hypothetical protein														1
I	2647066	Δ6 bp	coding (846‑851/2037 nt)	ftsH ←	ATP‑dependent zinc metalloprotease FtsH						1	1	1	1	1	1	1	1	1	1	1	1	1	1
I	2674006	G→A	M119I (ATG→ATA)	Vag1382_24130 →	peptide ABC transporter ATP‑binding protein			1
I	2677716	G→A	E79K (GAG→AAG)	Vag1382_24160 →	N‑acetylglucosamine kinase											1
I	2701438	+TA	coding (594/717 nt)	sfsA →	sugar fermentation stimulation protein						1	1	1	1	1	1	1	1	1	1	1	1	1	1	1	1	1
I	2849190	C→T	M12I (ATG→ATA)	Vag1382_25600 ←	PTS sugar transporter subunit IIB													1
I	2906779	+T	coding (52/1470 nt)	Vag1382_26230 →	RNA polymerase sigma‑54 factor (RpoN)																						1
I	2945950	A→G	L25S (TTA→TCA)	Vag1382_26550 ←	MSHA biogenesis protein MshM			1
I	2948638	C→T	A24T (GCG→ACG)	Vag1382_26580 ←	MSHA biogenesis protein MshJ																	1
I	2952458	C→T	intergenic (‑288/+43)	Vag1382_26600 ← / ← Vag1382_26610	RNase E specificity factor CsrD/maturase																	1
I	2994806	G→T	N433K (AAC→AAA)	glpB ←	anaerobic glycerol‑3‑phosphate dehydrogenase subunit B					1
I	3043502	G→A	G733D (GGT→GAT)	ppc →	phosphoenolpyruvate carboxylase				1
I	3044409	G→T	A16S (GCA→TCA)	Vag1382_27340 →	transcriptional regulator																1
I	3092546	A→G	I44T (ATC→ACC)	hflC ←	protein HflC					1
I	3153504	C→T	A601T (GCC→ACC)	Vag1382_28340 ←	sensor histidine kinase																	1
I	3165796	G→A	G127D (GGC→GAC)	dusB →	tRNA‑dihydrouridine synthase B									1
I	3204405	C→T	S1251N (AGC→AAC)	rpoB ←	DNA‑directed RNA polymerase subunit beta						1	1	1	1	1	1	1	1	1	1	1	1	1	1	1	1	1
I	3206619	T→A	Q513L (CAG→CTG)	rpoB ←	DNA‑directed RNA polymerase subunit beta		1	1	1	1
I	3207219	G→A	A313V (GCT→GTT)	rpoB ←	DNA‑directed RNA polymerase subunit beta				1
I	3230285	G→A	intergenic (‑301/‑257)	Vag1382_r00280 ← / → Vag1382_28770	16S ribosomal RNA/RNA‑binding protein													1
I	3281680	C→A	P225Q (CCG→CAG)	Vag1382_29290 →	heme biosynthesis operon protein HemX																1
I	3318325	C→T	A206T (GCG→ACG)	thiG ←	thiazole synthase																			1
I	3320871	C→T	D182N (GAT→AAT)	thiE ←	thiamine phosphate synthase																	1
I	3338803	C→T	V173M (GTG→ATG)	Vag1382_29730 ←	DNA protecting protein DprA																	1
I	3339019	G→A	P101S (CCG→TCG)	Vag1382_29730 ←	DNA protecting protein DprA				1
I	3353577	C→T	A44T (GCG→ACG)	Vag1382_29890 ←	acyltransferase					1
I	3364002	C→T	R38R (AGG→AGA)	Vag1382_29970 ←	LysR family transcriptional regulator								1
I	3372619	C→T	V153I (GTT→ATT)	atpA ←	ATP synthase subunit alpha			1
I	3394671	G→A	A133V (GCT→GTT)	Vag1382_30280 ←	hypothetical protein								1
I	3402455	G→A	A650A (GCG→GCA)	Vag1382_30340 →	hypothetical protein													1
I	3405906	(GCCGAA)12→13	coding (264/2388 nt)	Vag1382_30350 →	hypothetical protein						1	1	1	1	1	1	1	1	1	1	1	1	1	1
II	5498	C→T	intergenic (+227/‑55)	Vag1382_30560 → / → Vag1382_30570	hypothetical protein/GTP cyclohydrolase‑2												1
II	20602	G→A	R431C (CGC→TGC)	Vag1382_30720 ←	methyl‑accepting chemotaxis protein				1
II	52488	G→A	H317Y (CAC→TAC)	Vag1382_31040 ←	pseudouridine synthase													1
II	55548	G→A	V130M (GTG→ATG)	Vag1382_31070 →	LysR family transcriptional regulator													1
II	76505	G→A	R361H (CGC→CAC)	Vag1382_31280 →	MBL fold metallo‑hydrolase				1									1			1
II	99380	C→T	R138Q (CGG→CAG)	Vag1382_31520 ←	N‑acetyltransferase			1														1
II	103885	C→T	A483V (GCG→GTG)	Vag1382_31560 →	trimethylamine N‑oxide reductase I catalytic subunit				1
II	105579	G→A	P26S (CCT→TCT)	Vag1382_31570 ←	phosphatidylglycerophosphatase B														1
II	110920	C→T	T162T (ACG→ACA)	Vag1382_31640 ←	hydroxymethylpyrimidine/phosphomethylpyrimidine kinase											1
II	122794	G→A	A131T (GCT→ACT)	Vag1382_31690 →	hypothetical protein													1
II	144865	C→T	P77L (CCT→CTT)	Vag1382_31940 →	ABC transporter substrate‑binding protein											1
II	148048	C→T	W318* (TGG→TGA)	Vag1382_31960 ←	oligopeptidase B																			1
II	186283	C→T	A237T (GCC→ACC)	Vag1382_32240 ←	hypothetical protein				1
II	186761	C→T	T77T (ACG→ACA)	Vag1382_32240 ←	hypothetical protein				1
II	198707	G→A	A59T (GCA→ACA)	Vag1382_32340 →	hypothetical protein													1
II	203987	C→T	A707V (GCA→GTA)	Vag1382_32380 →	hypothetical protein											1
II	210625	C→T	A117T (GCA→ACA)	Vag1382_32460 ←	hypothetical protein											1					1
II	224928	G→A	T18M (ACG→ATG)	phnW ←	2‑aminoethylphosphonate‑‑pyruvate transaminase				1
II	240464	A→G	I53I (ATT→ATC)	Vag1382_32720 ←	LysR family transcriptional regulator											1
II	243304	C→T	Q363Q (CAG→CAA)	Vag1382_32750 ←	L‑serine ammonia‑lyase																1
II	255362	G→A	G53S (GGC→AGC)	flgI2 →	flagellar P‑ring protein 2 FlgI						1	1	1	1	1	1	1	1	1	1	1	1	1	1		1
II	256519	T→C	V61A (GTT→GCT)	Vag1382_32920 →	flagellar protein FlgJ						1	1	1	1	1	1	1	1	1	1	1	1	1	1
II	268588	C→T	I94I (ATC→ATT)	groS2 →	10 kDa chaperonin 2																	1
II	273907	C→T	A73T (GCG→ACG)	Vag1382_33090 ←	hypothetical protein							1
II	276710	C→T	T253M (ACG→ATG)	eutB →	ethanolamine ammonia lyase large subunit							1
II	279178	C→T	R309C (CGC→TGC)	eutP →	ethanolamine permease																	1
II	282224	G→A	L402L (CTA→TTA)	Vag1382_33160 ←	alpha‑1 2‑mannosidase			1
II	322037	C→T	G152S (GGT→AGT)	Vag1382_33500 ←	MFS transporter																	1
II	344824	C→T	T330I (ACA→ATA)	Vag1382_33710 →	beta‑mannosidase																	1
II	344834	C→T	R333R (CGC→CGT)	Vag1382_33710 →	beta‑mannosidase																	1
II	347751	C→T	A180T (GCT→ACT)	Vag1382_33730 ←	outer membrane protein																	1
II	363171	C→T	E111K (GAA→AAA)	purA ←	adenylosuccinate synthetase														1
II	363177	C→T	A109T (GCA→ACA)	purA ←	adenylosuccinate synthetase																	1
II	370058	C→T	R149H (CGT→CAT)	Vag1382_33920 ←	aspartate aminotransferase family protein																	1
II	390684	C→T	intergenic (+85/+21)	Vag1382_34100 → / ← rhlE	hypothetical protein/ATP‑dependent RNA helicase RhlE														1
II	403649	C→T	G125G (GGC→GGT)	Vag1382_34240 →	beta‑ketoacyl‑ACP reductase																	1
II	419369	C→T	V82I (GTC→ATC)	Vag1382_34390 ←	hypothetical protein														1
II	423695	G→A	C22C (TGC→TGT)	Vag1382_34450 ←	patatin family protein			1
II	424425	G→A	P21L (CCA→CTA)	Vag1382_34470 ←	hypothetical protein			1
II	430507	C→T	D104N (GAC→AAC)	Vag1382_34530 ←	sensor histidine kinase														1
II	455224	C→T	S182F (TCT→TTT)	Vag1382_34780 →	GntR family transcriptional regulator																			1
II	463895	C→T	L254L (CTC→CTT)	Vag1382_34860 →	hybrid sensor histidine kinase/response regulator																	1
II	471285	C→T	A228V (GCG→GTG)	luxQ →	autoinducer 2 sensor kinase/phosphatase LuxQ																	1
II	484013	C→T	A186V (GCT→GTT)	secF →	protein‑export membrane protein SecF																			1
II	513122	(AAAAAT)3→2	intergenic (+160/‑50)	Vag1382_35310 → / → Vag1382_35320	MFS transporter/methyl‑accepting chemotaxis protein						1	1	1	1	1	1	1	1	1	1	1	1	1	1	1	1	1
II	515260	C→T	G538D (GGT→GAT)	tkt2 ←	transketolase 2																	1
II	527411	C→T	V193I (GTC→ATC)	Vag1382_35420 ←	molybdopterin‑synthase adenylyltransferase MoeB																	1
II	559828	C→T	R22C (CGC→TGC)	Vag1382_35620 →	lipoprotein																			1
II	564440	C→T	A1200A (GCC→GCT)	Vag1382_35630 →	hypothetical protein																	1
II	573010	C→T	S666L (TCA→TTA)	Vag1382_35670 →	type VI secretion protein VgrG																	1
II	580505	C→T	L467F (CTT→TTT)	Vag1382_35730 →	type VI secretion‑associated protein																	1
II	627466	C→T	Y260Y (TAC→TAT)	Vag1382_36140 →	branched‑chain amino acid ABC transporter substrate‑binding protein													1
II	669966	A→G	Q247Q (CAA→CAG)	Vag1382_36490 →	GGDEF domain‑containing protein																1
II	692085	C→T	A117V (GCC→GTC)	Vag1382_36670 →	hypothetical protein					1
II	712954	+T	coding (564/951 nt)	Vag1382_36880 →	iron(III) ABC transporter permease																			1
II	751465	C→T	R205C (CGT→TGT)	Vag1382_37080 →	arylsulfatase				1
II	769496	C→A	G178V (GGA→GTA)	Vag1382_37250 ←	Zn‑dependent protease									1	1	1	1	1	1	1	1	1	1	1
II	798594	C→T	P356S (CCT→TCT)	Vag1382_37500 →	aldehyde dehydrogenase					1
II	951451	C→T	L169L (CTG→TTG)	Vag1382_39030 →	hydrolase				1
II	963770	G→A	A281V (GCT→GTT)	Vag1382_39140 ←	oxidoreductase alpha (molybdopterin) subunit					1
II	1012214	T→A	T144T (ACT→ACA)	alr2 →	alanine racemase 2						1	1	1	1	1	1	1	1	1	1	1	1	1	1
II	1059819	C→T	S154N (AGT→AAT)	Vag1382_39900 ←	FHA domain‑containing protein											1
II	1146312	C→T	R356H (CGT→CAT)	Vag1382_40630 ←	acyl‑CoA dehydrogenase																	1
II	1156932	C→T	intergenic (‑32/+180)	Vag1382_40720 ← / ← Vag1382_40730	permease/FAD‑binding oxidoreductase																	1
II	1158941	C→T	A407T (GCG→ACG)	Vag1382_40730 ←	FAD‑binding oxidoreductase																	1
II	1171882	C→T	E35E (GAG→GAA)	ackA2 ←	acetate kinase 2														1
II	1194238	G→A	P63L (CCT→CTT)	Vag1382_41000 ←	GTPase														1
II	1214563	A→G	D8G (GAC→GGC)	Vag1382_41170 →	hypothetical protein																	1
II	1246777	C→T	S175S (TCC→TCT)	Vag1382_41510 →	hypothetical protein																	1
II	1247812	A→C	I181S (ATC→AGC)	cyoE1 ←	protoheme IX farnesyltransferase 1					1
II	1292447	C→T	D85N (GAT→AAT)	Vag1382_41980 ←	AraC family transcriptional regulator																			1
II	1368277	G→A	K239K (AAG→AAA)	pyrC →	dihydroorotase																1
II	1376578	C→T	A346A (GCG→GCA)	malE ←	maltose ABC transporter substrate‑binding protein MalE																	1
II	1383775	C→T	A256V (GCA→GTA)	Vag1382_42830 →	hypothetical protein																	1
II	1398850	C→T	G225R (GGG→AGG)	Vag1382_42970 ←	PTS fructose transporter subunit IIA			1
II	1414303	G→A	A325V (GCT→GTT)	Vag1382_43100 ←	aldehyde dehydrogenase																1
II	1479177	C→T	intergenic (+268/‑70)	Vag1382_43590 → / → Vag1382_43600	MFP transporter/UPF0397 protein																	1
II	1533137	T→G	H167P (CAT→CCT)	Vag1382_44090 ←	sigma‑54‑dependent Fis family transcriptional regulator LafK						1	1	1	1	1	1	1	1	1	1	1	1	1	1
II	1534464	C→T	W64* (TGG→TGA)	Vag1382_44100 ←	sodium‑type flagellar protein MotY		1	1	100%	1
II	1539512	(G)7→8	coding (295/2091 nt)	Vag1382_44170 →	flagellar biosynthesis protein FlhA																						1
II	1601478	C→T	S161L (TCA→TTA)	Vag1382_44790 →	hypothetical protein				1
II	1602415	C→T	intergenic (+153/‑250)	Vag1382_44790 → / → Vag1382_44800	hypothetical protein/proton/glutamate symporter				1
II	1621673	C→T	H688H (CAC→CAT)	malT →	HTH‑type transcriptional regulator MalT				1
II	1629018	C→T	Q89Q (CAG→CAA)	pdxY ←	pyridoxal kinase PdxY			1
II	1633092	C→T	S61S (TCG→TCA)	Vag1382_45010 ←	ornithine decarboxylase SpeF				1
II	1653212	C→T	V53V (GTC→GTT)	Vag1382_45150 →	hypothetical protein																			1
II	1674304	C→T	T222I (ACC→ATC)	Vag1382_45270 →	vibrioferrin biosynthesis protein PvsB																			1
