# Supplementary material for: Deciphering the genomes of motility-deficient mutants of Vibrio alginolyticus 138-2
Source: PeerJ journal article supplement (doi:10.7717/peerj.17126), 2024-03-18

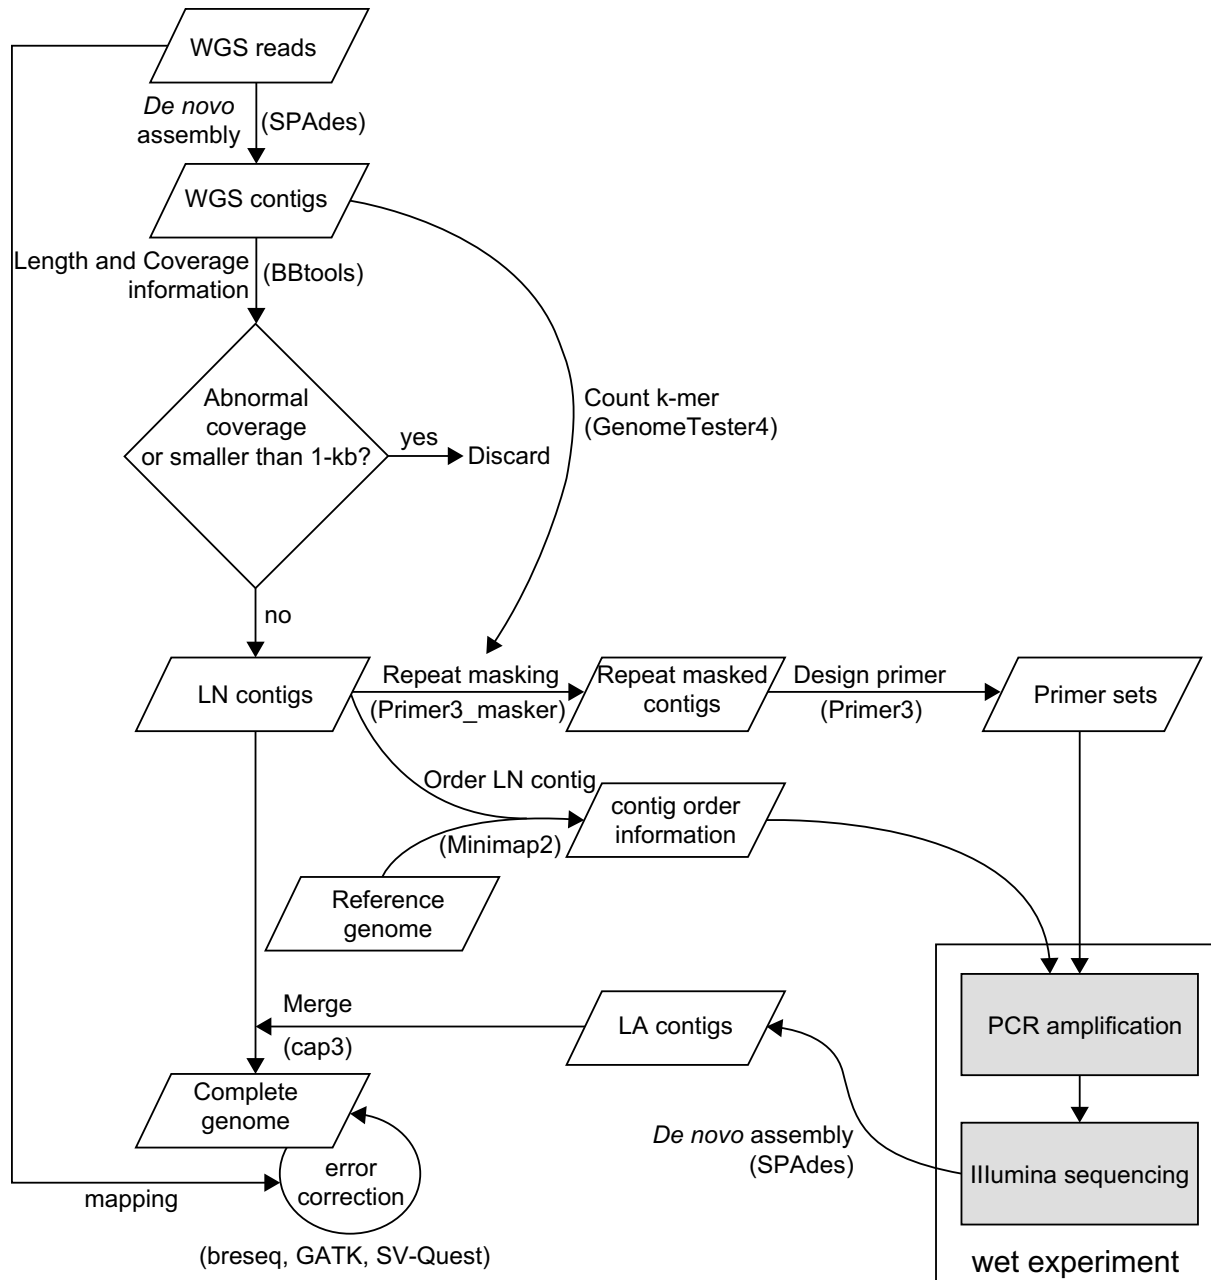

Supplement: Supplementary_Figure1.pdf [file Supplementary_Figure1.pdf]
